# Supplementary material for: Quantifying the risk of error when interpreting funnel plots
Source: Springer Nature journal article supplement (doi:10.1186/s13643-015-0004-8), 2015-03-10

Power to detect publication bias

Asymmetry Distance

Egger's test

Imbalance

100  
75  
50  
25  
0

0 25 50 75 100

0 25 50 75 100

0 25 50 75 100

Pub. bias case

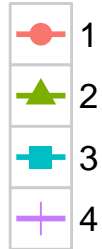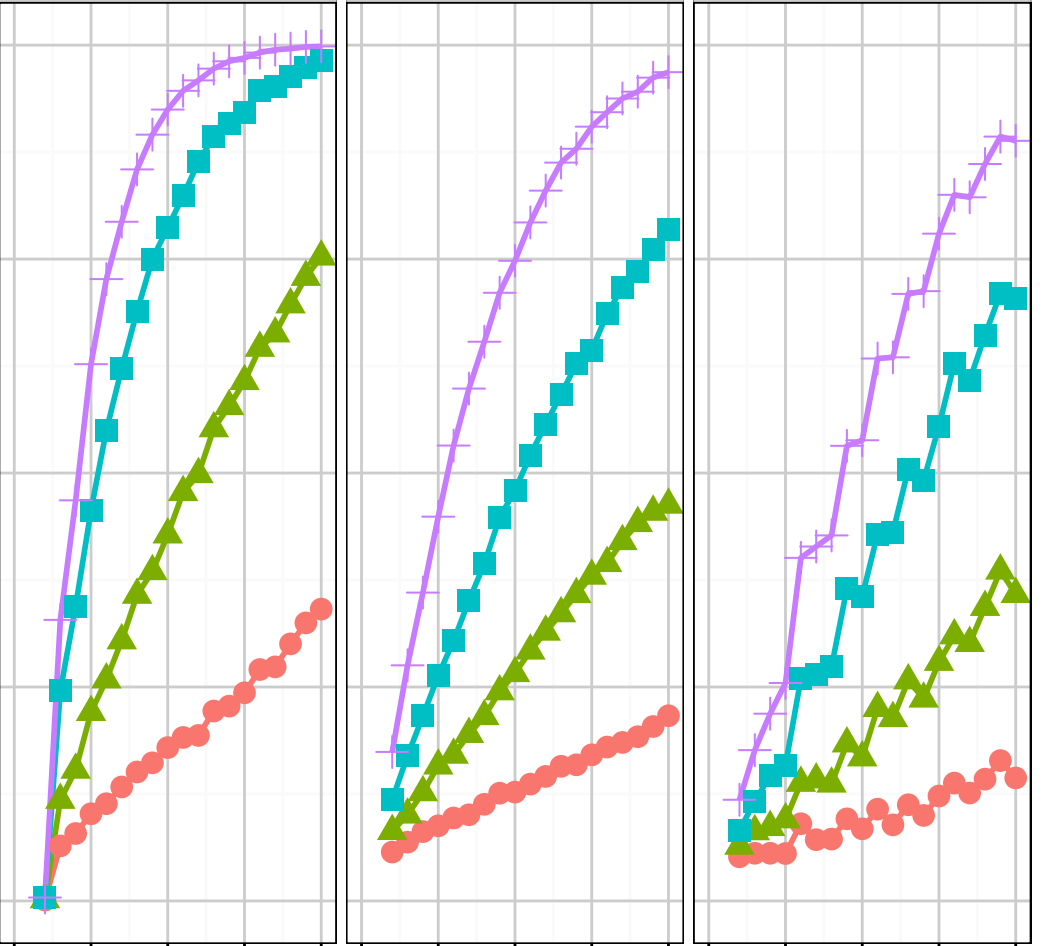

Supplement: MOESM1 [file 9787340]
