# Supplementary material for: Quantifying the risk of error when interpreting funnel plots
Source: Springer Nature journal article supplement (doi:10.1186/s13643-015-0004-8), 2015-03-10

Power to detect publication bias

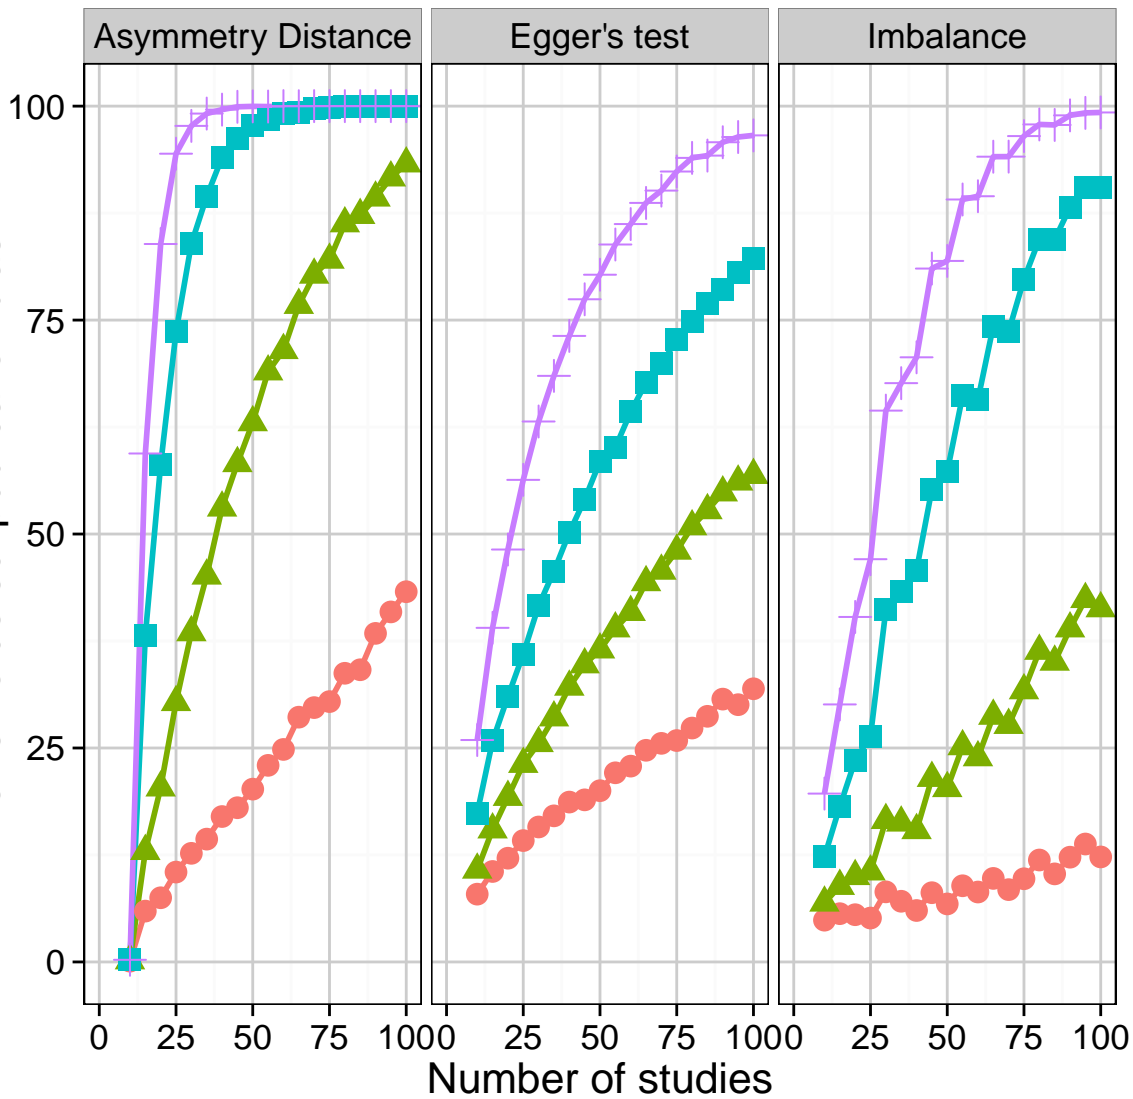

Supplement: MOESM2 [file 9787340]
